1 Wbm0076, a candidate effector protein of the *Wolbachia* endosymbiont of *Brugia*  
2 *malayi*, disrupts eukaryotic actin dynamics

3

4 Running Title: A *Wolbachia* protein regulates actin dynamics

5

6 Michael K. Mills<sup>1</sup>, Lindsey G. McCabe<sup>1</sup>, Karl F. Lechtreck<sup>2</sup>, and Vincent J. Starai<sup>1,3</sup>

7

8 Departments of <sup>1</sup>Microbiology, <sup>2</sup>Cellular Biology, and <sup>3</sup>Infectious Diseases

9

University of Georgia, Athens, GA

10

11 To whom correspondence should be addressed:

12 Vincent J. Starai, (706) 542-5755, [vjstarai@uga.edu](mailto:vjstarai@uga.edu)

13

14 **ABSTRACT**

15 *Brugia malayi*, a parasitic roundworm of humans, is colonized by the obligate intracellular  
16 bacterium, *Wolbachia pipientis*. The symbiosis between this nematode and bacterium is  
17 essential for nematode reproduction and long-term survival in a human host. Therefore,  
18 identifying molecular mechanisms required by *Wolbachia* to persist in and colonize *B.*  
19 *malayi* tissues will provide new essential information regarding the basic biology of this  
20 endosymbiosis. *Wolbachia* utilize a Type IV secretion system to translocate so-called  
21 “effector” proteins into the cytosol of *B. malayi* cells to promote colonization of the  
22 eukaryotic host. However, the characterization of these *Wolbachia* secreted proteins  
23 (wSPs) has remained elusive due to the genetic intractability of both organisms.  
24 Strikingly, expression of the wSP, Wbm0076, in the surrogate eukaryotic cell model,  
25 *Saccharomyces cerevisiae*, resulted in the disruption of the yeast actin cytoskeleton and  
26 inhibition of endocytosis. Genetic analyses show that Wbm0076 is a member of the family  
27 of Wiskott-Aldrich syndrome proteins (WAS[p]), a well-conserved eukaryotic protein  
28 family required for the organization of actin skeletal structures. Thus, Wbm0076 likely  
29 plays a central role in the active cell-to-cell movement of *Wolbachia* throughout *B. malayi*  
30 tissues during nematode development. As most *Wolbachia* isolates sequenced to date  
31 encode at least partial orthologs of Wbm0076, we find it likely that the ability of *Wolbachia*  
32 to directly manipulate host actin dynamics is an essential requirement of all *Wolbachia*  
33 endosymbioses, independent of host cell species.

34

## 35 **AUTHOR SUMMARY**

36 Filarial nematodes of the family Onchocercidae cause several debilitating human diseases such  
37 as lymphatic filariasis and onchocerciasis; more than 50 million people are infected by these  
38 arthropod-borne roundworms in mostly tropical and sub-tropical regions. Many of these  
39 nematodes, including *Brugia malayi*, are obligately colonized by an intracellular bacterium of the  
40 genus *Wolbachia*, which is absolutely required for the proper development and reproduction of  
41 these worms in a mammalian host. Clearance of *Wolbachia* from these nematodes leads to a loss  
42 of both worm viability and its ability to cause disease in humans. Efforts to understand the  
43 molecular interactions required to maintain this important bacterium:nematode endosymbiosis,  
44 however, have been hampered due to the genetic intractability of these organisms. In this work,  
45 we utilize yeast as a surrogate eukaryotic cell to show that a candidate secreted effector protein  
46 from *Wolbachia*, Wbm0076, disrupts actin dynamics and endocytosis. We also observe  
47 interactions of Wbm0076 with a highly-conserved eukaryotic actin regulatory protein. As some  
48 intracellular bacteria manipulate host actin dynamics to promote mobility within or into host cells,  
49 our study provides evidence of an important *Wolbachia* protein activity that may be essential for  
50 its proper localization during the development of *B. malayi*.

51

## 52 **INTRODUCTION**

53 The parasitic filarial nematode *Brugia malayi* is a causative agent of lymphatic filariasis,  
54 a devastating and neglected human tropical disease, reported to have infected  
55 approximately 120 million individuals world-wide at the turn of the century [1]. These  
56 mosquito-borne nematodes are transmitted as infective larvae (L3) to human hosts  
57 through a blood meal and adult worms persist for years in untreated individuals (5-14

58 years), causing advanced disease states (elephantiasis) [2] that place a massive  
59 humanitarian burden on countries endemic for the causative organisms [3]. Lymphatic  
60 filariasis has been successfully targeted by the World Health Organization (WHO) [4, 5]  
61 through mass drug administration (MDA) in endemic countries [5, 6]. Unfortunately,  
62 despite the documented success of WHO in blocking vector transmission of  
63 microfilariae to humans, global elimination of lymphatic filariasis did not occur by the  
64 proposed year 2020, and more than 800 million people remain threatened by the  
65 disease [4, 5, 7]. Therefore, there remains a need to discover anti-filarial, adulticidal  
66 treatments to support the long war against human filarial diseases [8-10].

67 In the twentieth century, it was discovered that some filarial nematodes were host to  
68 intracellular bacteria [11-13]. Consequently, treatment of filarial worms with tetracycline  
69 cleared the bacterial endosymbiont, *Wolbachia pipientis* [14-16], and resulted in fertility  
70 defects and the consequent demise of these worms [17-19]. Additional studies showed  
71 that *B. malayi* (among other nematodes in the family Onchocercidae) absolutely  
72 requires this obligate intracellular bacterium for long-term survival and reproduction [20,  
73 21]. Therefore, identifying the mechanisms essential for the intracellular survival and  
74 proliferation *Wolbachia* within *B. malayi* should unveil new molecular targets for  
75 treatment of some filarial diseases.

76 *Wolbachia* has the genetic components to build a functional type IV secretion system  
77 (T4SS) [22-25], which is known to be transcribed and translated by *Wolbachia* in vivo  
78 [23, 26]. Importantly, reconstitution of the *Wolbachia* T4SS (*wT4SS*) secretion system  
79 coupling proteins into an *E. coli*-derived and expressed T4SS apparatus was shown to  
80 be capable of translocating a number of *Wolbachia* candidate T4SS effector protein

81 substrates [27], thus strongly implying the functionality and importance of the *wT4SS*  
82 during the *Wolbachia*:host endosymbiosis. Although a few *Wolbachia* surface proteins  
83 (*wSPs*) are also predicted to be involved in host protein interactions [28] within the cells  
84 of *B. malayi* and are suggested to be secreted into the host [29], the molecular  
85 characterization of *Wolbachia* secreted proteins (*wSPs*) has remained elusive.

86 Recently, our laboratory has screened a number of candidate *wSPs* from the *Wolbachia*  
87 endosymbiont of *B. malayi* (*wBm*) for biological activity in a well-established surrogate  
88 model of the eukaryotic cell, *Saccharomyces cerevisiae* [30]. High-level expression of  
89 these *wSPs* in yeast revealed several that induced general growth defects and  
90 disruptions of protein and membrane trafficking, providing initial clues to their activities  
91 in a eukaryotic host cell. One such gene, *wBm0076*, strongly inhibited yeast growth and  
92 induced the formation of aberrant cortical actin patches in the cell upon expression [30].

93 The *Wbm0076* protein is predicted to be a member of Wiskott-Aldrich syndrome  
94 proteins (*WASp*), which regulate core conserved actin polymerization machineries in  
95 eukaryotes through the recruitment and activation of the Arp2/3 protein complex to pre-  
96 existing actin filaments. There, Arp2/3p nucleates actin monomers (G-actin), thus  
97 initiating the polymerization of filamentous actin (F-actin) at a 70° angle from the mother  
98 filament [31-33]. The formation of these branched actin structures is critical for central  
99 cellular pathways, such as motility and endo/phagocytosis [34-36]. As the proper  
100 spatiotemporal regulation of actin filamentation by regulatory proteins is often crucial for  
101 cellular functions, we hypothesized that *Wbm0076* functions as a *WAS(p)* family protein  
102 to directly modulate the actin dynamics in host cells to support *wBm* colonization and  
103 survival in vivo.

104 In this work, we now show that Wbm0076 behaves as an authentic WASp-family protein  
105 in vivo. Overproduction of this protein in yeast strongly inhibits endocytosis by  
106 preventing the interaction of branched actin patches with endocytic protein machineries.  
107 Structure/function analyses show that mutations introduced into conserved actin-binding  
108 or Arp2/3-binding domains of wBm0076 reduce its ability to increase the formation of  
109 actin patches in vivo and concomitant reduction of the overall toxicity of Wbm0076.  
110 Taken together, these data provide additional molecular evidence that *Wolbachia*  
111 produces and secretes proteins required to modulate the actin cytoskeleton of its  
112 invertebrate hosts, which is likely critical for the previously proposed ability of *Wolbachia*  
113 to mobilize through host cells via cell-to-cell transmission pathways [37, 38]. We expect  
114 that this work will pave the way for further studies in *B. malayi* to promote both the  
115 understanding of the molecular basis of the *Wolbachia*:host endosymbiosis, and future  
116 discoveries of potential inhibitors of the *Wolbachia*-*B. malayi* relationship.

117

## 118 **RESULTS**

### 119 **Wbm0076 inhibits yeast endocytosis by decoupling actin patches from sites of** 120 **endocytosis.**

121 To further investigate the impact of wBm0076 expression on yeast actin dynamics and  
122 growth toxicity, we considered the possibility that Wbm0076 may be inhibiting clathrin-  
123 mediated endocytosis in yeast by aberrantly recruiting and siphoning actin monomers  
124 and other endocytosis related actin-patch proteins (eRAPs) from conventional endocytic  
125 sites. As increased cell size is a typical phenotype of cells unable to endocytose plasma

126 membrane to balance the delivery of lipids to the cell membrane[39], a lack of  
127 endocytosis in *wBm0076*-expressing cells would explain the enlarged cell phenotype in  
128 the presence of *Wbm0076* previously observed by our laboratory[30].

129 The order in which specific endocytic coat proteins and actin patch components arrive  
130 to the sites of endocytosis in yeast is relatively well known and can be used to visualize  
131 the real-time formation of endocytic vesicles [40] (Fig. 1). To determine the effects of  
132 *Wbm0076* on actin-mediated endocytosis, we expressed *wBm0076* in yeast strains  
133 harboring GFP fusions marking three different timepoints of actin-mediated endocytosis:  
134 Ede1-GFP (early scaffolding protein [41]), Sla1p-GFP (late vesicle coat protein  
135 interacting with the actin cytoskeleton [42]), and Sac6-GFP (actin bundling protein [43]).  
136 Abp1p binds actin filaments and interacts with several eRAPs at the actin patch, and is  
137 thought to a primary regulator of those eRAPs and local actin dynamics [44]. Therefore,  
138 we studied the localization of these eRAPs in comparison to Abp1p-positive cortical  
139 actin patches in the presence or absence of *Wbm0076*, as the spatial dynamics  
140 between these proteins during endocytosis is known [40]. Specifically, the early scaffold  
141 membrane protein, Ede1p, does not colocalize with Abp1p, a protein that arrives later in  
142 clathrin-mediated endocytosis. Sla1p, on the other hand, is known to interact with  
143 eRAPs that connect the actin patch machinery to the budding endocytic vesicle on the  
144 yeast membrane [42]. Consequently, Sla1p transiently colocalizes with Abp1p as  
145 endocytic vesicles mature and interact with polymerizing branched actin patches [40].  
146 Finally, Sac6p is directly associated with both the actin patch and endocytic vesicle and  
147 is therefore expected to colocalize with Abp1p late in endocytosis.

148 To localize these endocytic markers in the context of branched actin and *wBm0076*  
149 expression, the galactose-inducible vectors pYES2/NT A control or pYES2/NT A-  
150 *wBm0076* were introduced into yeast strains constitutively expressing Abp1-mCherry  
151 and GFP fusions of Ede1p, Sla1p, or Sac6p. Expression of *wBm0076* was driven by  $\beta$ -  
152 estradiol induced chimeric *GAL4* (*GAL4.ER.VP16*) activation of the *GAL1/10* promoters  
153 [45, 46]. We observed that Ede1-GFP is clearly localized at plasma membrane sites that  
154 do not colocalize with Abp1-mCherry-positive cortical actin patches, as expected (Fig.  
155 2A). Moreover, expression of *wBm0076* in this strain did not alter the localization of  
156 either Ede1-GFP or Abp1-mCherry, despite the drastic increase in total Abp1-mCherry  
157 punctae (Fig. 2A). In vector control conditions, Sla1-GFP localized predominantly at the  
158 plasma membrane and partially colocalized with Abp1-mCherry-positive cortical actin  
159 patches, as expected (Fig. 2A), while the actin-bundling protein, Sac6p, colocalized with  
160 Abp1 nearly perfectly (Fig. 2A). After a 6 h  $\beta$ -estradiol induction of *wBm0076*-harboring  
161 strains, Sac6-GFP and Abp1-mCherry are generally colocalized, although the number  
162 of Sac6p-GFP colocalized punctae are much more numerous when compared to control  
163 conditions, suggesting an increase of Sac6p/Abp1p-containing branched actin patches  
164 (Fig. 2A). While expression of *wBm0076* does not drastically alter the colocalization of  
165 Abp1-mCherry and either Sac6-GFP or Ede1-GFP, we noticed a striking separation of  
166 Sla1-GFP and Abp1-mCherry in the presence of *wBm0076* (Figs. 2A and 2B). Taken  
167 together, these results suggest that *wBm0076* expression disrupts the interactions of  
168 the late endocytic vesicle coat proteins with the actin cytoskeleton.

169 To observe the effects of *wBm0076* expression on clathrin-mediated endocytosis in real  
170 time, we chose to visualize endocytic vesicle formation and internalization using Total



171 Internal Reflection Fluorescence (TIRF) microscopy. TIRF microscopy has long been  
172 used to study the kinetics and regulation of yeast endocytosis in detail [53-55]. Using  
173 this technique, we can observe endocytic vesicles form at the plasma membrane as  
174 fluorescence increases. As endocytic components track back into the cytoplasm to  
175 enter endosomal trafficking pathways, however, fluorescence is lost. Because we  
176 observed a striking de-localization of Abp1p and Sla1p in the presence of Wbm0076,  
177 we visualized endocytosis in yeast strains harboring both Sla1-GFP (late coat) and  
178 Abp1-mCherry (branched actin polymerization). Normal dynamics of endocytic vesicle  
179 formation was observed under control conditions, with the initial formation of Sla1-GFP  
180 patches (green) at the plasma membrane, Abp1-mCherry colocalization with Sla1p after  
181 several seconds (yellow), followed by Sla1p disappearance and then Abp1p “leaving” by  
182 being drawn into the cytoplasm (Fig. 2C). This was observed both over the course of a  
183 single patch lifetime (Fig. 2C, white arrowheads), as well as the lifetime of all patches  
184 observed in a single cell over ~ 6 min (Fig. 2D). We noted that the addition of  $\beta$ -estradiol  
185 alone did appear to slightly increase the membrane residence times of all endocytic  
186 vesicles under vector control conditions (Fig. 2D, longer tracks), but given that  
187 endocytosis dynamics continued to be otherwise normal overall, we did not investigate  
188 this further. In strains harboring a *wBm0076* vector, we noted that residence times of  
189 both Sla1p and Abp1p were increased under non-induction conditions for *wBm0076*  
190 (Fig. 2B and 2C), however, patch organization and endocytosis dynamics appeared to  
191 follow the proper sequence of events under these conditions overall. In the presence of  
192 the 1  $\mu$ M  $\beta$ -estradiol inducer, however, both Sla1-GFP and Abp1-mCherry proteins were  
193 essentially static over the reported time frame (Figs. 2C and D). Furthermore, Sla1p and

194 Abp1p were never found to colocalize under these conditions, in support of the strong  
195 Sla1p/Abp1p delocalization previously observed in Fig. 2A. Movies of these  
196 experiments are included in Supplemental Material (Supplemental Movies S1, S2, S3,  
197 and S4). Taken together, these results show that Wbm0076 strongly inhibits yeast  
198 endocytosis by not only inducing the aberrant formation of Abp1p-positive branched  
199 actin punctae, but also by preventing the engagement of endocytic membrane  
200 components with the branched actin patches required for endocytic uptake in yeast.

201 **Mutation of transmembrane and VCA subdomains reduces Wbm0076 toxicity in**  
202 **vivo.**

203 WAS(p) family proteins are powerful actin regulators involved in the recruitment of the  
204 Arp2/3 protein complex along with actin monomers, to promote enhanced actin  
205 polymerization [31-33]. Their function is largely directed by a conserved “VCA” domain,  
206 where the verprolin/WH2 (V) domain sequesters and binds actin monomers [47], the  $\alpha$ -  
207 helical central region (C) helps direct the Arp2/3p complex binding to actin monomers  
208 [48], and the acidic (A) domain recruits and activates the Arp2/3p complex [31, 49].  
209 WAS(p) proteins are also recruited to the site of actin polymerization and activated via  
210 their interactions with WASP-interacting proteins (WIPs), PI(4,5)P<sub>2</sub>, and Cdc42 at the  
211 plasma membrane [50, 51]. While Wbm0076 contains the conserved VCA subdomains  
212 found in WAS(p)-family proteins, it also contains a putative N-terminal transmembrane  
213 domain which may direct this protein to membranes without a corresponding interaction  
214 with a host WIP protein [30, 51].

215 To assay the importance of the Wbm0076 transmembrane and VCA sub-domains for  
216 proper localization and activity of Wbm0076 *in vivo*, we individually substituted alanine  
217 for three highly conserved residues in each of the subdomains (Fig 3, W280A (A  
218 domain), R258A (C domain), R209A (V domain)) ([48, 49, 52]). Additionally, to test the  
219 requirement of the putative transmembrane helix *in vivo*, the *wBm0076* open reading  
220 frame was cloned into the expression vector without the first 61 amino acids (62-392).  
221 Expression of all mutant Wbm0076 proteins were confirmed via immunoblot (Fig S2).  
222 We then tested the ability of each of these proteins to inhibit yeast growth, disrupt actin  
223 dynamics *in vivo*, and assayed their localization compared to Abp140-GFP, an actin  
224 filament binding protein found at both actin cables and branched actin patches [53].

225 As seen previously, expression of *wBm0076* is toxic to yeast, and Wbm0076-mRuby2  
226 localizes to a large number of punctae containing Abp140-GFP at the yeast cortex [30].  
227 Removal of the predicted N-terminal transmembrane helix ( $\Delta$ TM*wBm0076*), however,  
228 completely abrogates the toxicity of Wbm0076 and causes the cytoplasmic  
229 accumulation of Wbm0076-mRuby2 (Figs. 3A and 3B), suggesting that membrane  
230 localization is critical for Wbm0076 activity in eukaryotes *in vivo*. Furthermore,  
231 expression of Wbm0076<sup>W280A</sup>, Wbm0076<sup>R258A</sup>, and Wbm0076<sup>R209A</sup> mutants show  
232 reduced toxicity *in vivo* when compared to the wild type (Fig. 3A), suggesting the  
233 presence of functional 'WH2', 'central', and 'acidic' (VCA) domains in the protein.  
234 Wbm0076<sup>W280A</sup>, Wbm0076<sup>R258A</sup>, and Wbm0076<sup>R209A</sup>-mRuby2 continue to show a  
235 punctate pattern of recruitment to the cell cortex (Fig. 3B), showing that the reduction in  
236 toxicity from these mutants is likely due to defects in activation of the Arp2/3p complex  
237 by these mutant proteins. Specifically, mutation of the acidic domain has the strongest

238 effect on Wbm0076 toxicity, followed by mutation at the central domain and WH2  
239 domain, respectively. These results support the requirements of membrane localization  
240 and functional WAS(p)-family VCA subdomains for Wbm0076 activity in vivo.

241 **N-terminal membrane association re-establishes Wbm0076 toxicity in yeast.** As it  
242 is known that WAS(p)-family proteins require proper spatiotemporal regulation at the  
243 cell membrane for function [54, 55], we wondered if the toxicity of  $\Delta$ TMwBm0076 could  
244 be restored by replacing the transmembrane domain of Wbm0076 with a membrane-  
245 targeting domain. The C2 domain of the lactadherin protein (LactC2) is a  
246 phosphatidylserine binding domain, a phospholipid found primarily on the cytosolic  
247 leaflet of the yeast plasma membrane [56]. Therefore, we created a chimeric  
248 Wbm00076 protein that contains LactC2 in place of the N-terminal transmembrane  
249 domain (GFPLactC2- $\Delta$ TMwBm0076). To ensure that LactC2 did not colocalize with  
250 actin patches at the cell cortex under wBm0076 expression, both GFPLactC2 and  
251 wBm0076 were expressed in an Abp1-RFP yeast background; GFPLactC2 alone was  
252 not toxic upon expression and did not colocalize with wBm0076-localized actin patches  
253 (Fig. S3). As expected, expression of GFP-wBm0076 remained toxic in the Abp1RFP  
254 background strain (Fig. 4A), but GFP $\Delta$ TMwBm0076 was much less toxic (Fig. 4A).  
255 Strikingly, the expression of the GFPLactC2- $\Delta$ TMwBm0076 protein restored toxicity of  
256 the truncated  $\Delta$ TMwBm0076 protein (Fig 3, Fig 4A). Furthermore, GFPLactC2-  
257  $\Delta$ TMwBm0076 was found to colocalize with Abp1RFP at the cell cortex in abnormally  
258 large actin patches (Fig 4B), showing that localization to membranes is critical for both  
259 the toxicity and presumed Arp2/3-activating activity of wBm0076 in vivo.

260 **Wbm0076 co-precipitates with Abp1p.** Abp1p is a highly-conserved nucleation  
261 promotion factor (NPF) that binds actin filaments with its N-terminal actin  
262 depolymerizing factor homology (ADFH) domain and recruits the Arp2/3 protein  
263 complex to these filaments with its acidic domains, thus promoting the actin nucleation  
264 activity of Arp2/3 [44, 57]. Abp1p is also thought to organize the cortical actin patch via  
265 interactions with a number of eRAPs using its ADFH and polyproline-binding SH3  
266 domain [44, 58, 59]. Therefore, Abp1p activity is critical for regulating actin dynamics  
267 and endocytosis and plays an important role in mammalian cortical actin dynamics [60].  
268 In our previous study, we noted that *abp1Δ* yeast strains reduced Wbm0076 toxicity in  
269 yeast [30]. Moreover, in various microscopy assays, Abp1p-RFP/mCherry localizes with  
270 Wbm0076 at aberrant actin patches (Figs. 3 and 4). As Wbm0076 contains various  
271 polyproline regions [30], we wondered whether Wbm0076 physically interacts with  
272 Abp1p in vivo.

273 To assess the possibility of this interaction, protein extracts from strains expressing only  
274 GST-Abp1p, only Wbm0076, or both proteins were incubated with glutathione beads,  
275 washed, and bound proteins eluted. Wbm0076 (containing an N-terminal Xpress  
276 epitope). GST-Abp1 was effectively pulled down from cell lysates under these  
277 conditions, as expected (Fig. 5, left panel), while Wbm0076 alone did not interact with  
278 the glutathione beads (Fig. 5, right panel). From cells harboring both pWbm0076 and  
279 pGST-Abp1p, however, Wbm0076 was clearly detected in the GST-Abp1 pulldown (Fig.  
280 5, right panel), suggesting either an indirect or direct interaction between these proteins  
281 in vivo.

282 **DISCUSSION**

283 *Saccharomyces cerevisiae* remains a powerful model of general eukaryotic biology,  
284 especially in the fields of protein trafficking [21], endolysosomal membrane dynamics  
285 [22], and cytoskeletal dynamics [23]. As these pathways are critical across eukaryotic  
286 cellular physiology, including nematodes, the structural and regulatory proteins of these  
287 pathways are typically conserved. Accordingly, we have recently used this system to  
288 characterize 47 candidate T4SS effector proteins from the uncultivable *Wolbachia*  
289 endosymbiont of *B. malayi* [30]. Of those 47, Wbm0076 demonstrated a unique ability to  
290 strongly inhibit yeast growth and disrupt normal actin dynamics. We now provide  
291 additional evidence that Wbm0076 functions as a WAS-like protein in vivo to directly  
292 modulate eukaryotic actin dynamics.

293 In this study, we observed that Wbm0076 is localized to actin patches at the cortex of  
294 the yeast cell, where its ability to produce aberrant branched actin structures is  
295 dependent on its conserved VCA subdomains (Fig 2)[30]. Endocytic vesicle invagination  
296 is likely inhibited in strains expressing wBm0076 due to the improper engagement of  
297 branched actin with endocytic vesicles after they have begun to form, as shown by  
298 Sla1p-GFP:Abp1p-mCherry mislocalization (Fig 4). Combined with the increase in actin  
299 patch numbers upon wBm0076 expression [30], these results suggest that perhaps  
300 Wbm0076 may be initiating the formation of *de novo* actin patches that are uncoupled  
301 from endocytic sites; a phenotype that has been previously seen in *sla2Δ* yeast strains,  
302 where the actin patch is weakly linked to membrane invagination, and actin comet tail-  
303 like structures, detached from the plasma membrane, are formed [61]. We also find that  
304 the transmembrane domain of Wbm0076 is required for membrane localization and  
305 subsequent activity in vivo (Figs. 2A and 2B). Removal of the predicted N-terminal

306 transmembrane helices completely abrogates the toxicity of Wbm0076 and causes the  
307 cytoplasmic accumulation of Wbm0076 (Figs. 2A and 2B). However, complementation  
308 of the transmembrane helices with the phosphatidylserine probe and membrane  
309 targeting domain, Lactadherin C2, restores Wbm0076 toxicity in vivo (Figs. 3A and 3B),  
310 showing that membrane localization is critical for Wbm0076 activity in vivo, presumably  
311 by placing Wbm0076 in proximity to the Arp2/3 complex and other regulatory proteins.

312 Interestingly, eukaryotic WAS(p)-family proteins are not known to contain  
313 transmembrane domains, but rather rely on interactions with other membrane-binding  
314 proteins to provide both membrane recruitment and subsequent activation of the  
315 WAS(p) protein [62]. For example, WASP (yeast Las17p) and N-WASP proteins are  
316 different from other WAS(p) family proteins in that they contain an N-terminal WIP  
317 (yeast Vrp1p) binding domain (WH1) [51, 63, 64]. By removing the requirement of  
318 interacting with other membrane-binding proteins for membrane recruitment, Wbm0076  
319 (and other *Wolbachia* orthologs) can be immediately placed into membranes post-  
320 secretion from the bacterium and initiate cytoskeletal rearrangements important for the  
321 intracellular lifestyle of *Wolbachia*.

322 The use of WAS(p)-family proteins by other intracellular bacteria to manipulate host  
323 actin dynamics is a well-known phenomenon. Important WAS(p)-family protein  
324 members secreted by bacteria include RickA and ActA of *Rickettsia conorii* and *L.*  
325 *monocytogenes*, respectively [65, 66]. These surface-exposed proteins recruit Arp2/3 to  
326 the bacterial cell wall and force the polymerization of actin to create actin “comet tails,” a  
327 branched network of short actin filaments that are continuously severed into monomers  
328 and repolymerized to provide the force to help the bacteria move through their host cells

329 and support the invasion of the bacterium into neighboring cells [66-69]. In the many  
330 ultrastructural studies of the nematode:*Wolbachia* relationship, however, actin comet  
331 tails surrounding intracellular *Wolbachia* bacteria have never been observed [70-72]  
332 However, other studies have suggested that *Wolbachia* utilizes host cortical actin  
333 machinery to mobilize across cells during nematode development, as well as requiring  
334 normal host actin dynamics to partition correctly into developing embryos [37] and  
335 clathrin-mediated endocytosis to promote endocytosis into *Drosophila* cells [38].  
336 Therefore, we find it likely that *Wolbachia* utilize secreted Wbm0076 orthologs to  
337 subvert local actin dynamics to regulate the movement of bacteria through and into host  
338 cells.

339 In a previous study performed in our lab, we noted that Wbm0076 toxicity was reduced  
340 in *abp1Δ* yeast strains[30], suggesting that Abp1p protein activity may be important for  
341 the in vivo activity of Wbm0076. Interestingly, in metazoans, Abp1p homologs have  
342 been shown to interact with WASP/N-WASP, WIPs, and the GTPase dynamin to link  
343 the actin dynamics machinery to the endocytic machinery and to promote the scission of  
344 the mature endocytic vesicle [60, 73-75]. We have confirmed that Wbm0076 co-  
345 precipitates with GST-Abp1 in yeast, suggesting that Wbm0076 either directly interacts  
346 with Abp1p, or is a part of a larger complex of actin regulatory proteins that contain  
347 Abp1p.

348 This result warrants further study, as in *B. malayi*, *Wolbachia* mobilizes from the  
349 hypodermal tissues to the reproductive organs as the microfilariae mature, and the loss  
350 of the bacterium through antibiotic treatment induces apoptosis and embryogenesis  
351 defects in the nematode that render *B. malayi* infertile [20, 21, 76]. *Wolbachia* have



352 been observed in the pseudocoelomic space of L4 and adult worms, interacting with the  
353 membrane at the distal tip of filarial ovaries [37, 70]. Moreover, it has been found that  
354 transcription levels of the *wBm0076* gene are highest in the body wall and ovaries of the  
355 adult female *B. malayi*, suggesting the effector is involved in *wBm* invasion of ovaries in  
356 this maturation step [77]. *B. malayi* contains homologs of WIP (*Bm5420*), Abp1p  
357 (*Bm4914*), dynamin (*Bm1908*), and all the subunits of the Arp2/3 complex (BMA-ARX  
358 complex). Due to the *Wbm0076*-Abp1p interaction we observed, we believe that *wBm*  
359 utilizes *Wbm0076* as a WASP-like protein to target host cortical actin structures to  
360 promote its endocytic uptake into both gonads and neighboring cells. As *wBm0076*  
361 orthologs exist throughout *Wolbachia* (Fig. 6), we feel that this is a common theme  
362 across *Wolbachia*:host symbioses. Even though we observed *Wbm0076* was a potent  
363 inhibitor of yeast endocytosis, expression levels of *wBm0076* in this model cell would be  
364 vastly greater than what *Wolbachia* could deliver to a host cell. In addition, *Wbm0076*  
365 would also be utilized as part of a cocktail of effectors secreted into the host by the  
366 bacterium, some of which may provide the proper spatiotemporal regulation of  
367 *Wbm0076* lacking in our study. Therefore, continued analysis of the *Wbm0076* binding  
368 targets (both host and bacterial) and authentic localization of *Wbm0076* in *B. malayi* will  
369 likely identify the molecular requirements for the critical cell entry and mobility pathways  
370 that support the intracellular persistence of *Wolbachia* in hosts.

## 371 **METHODS**

### 372 **Yeast strains and plasmid constructions**

373 For the microscopy in Figs 2 and 3, yeast strains were derivatives of SEY6210a (*MATa*  
374 *ura3-52 leu2-3, 112 his3-Δ100 trp1-Δ901 lys2-801 suc2-Δ9*), obtained as a kind gift  
375 from Dr. Derek Prosser. For all other studies, yeast strain BY4742 (*MATα his3Δ1*  
376 *leu2Δ0 lys2Δ0 ura3Δ0*) was used. In order to create yeast strains that activate *GAL1*  
377 promoters via the addition of  $\beta$ -estradiol, strains were transformed with linearized pAGL  
378 (a gift from Dr. Daniel Gottschling, University of Washington), which introduces the gene  
379 encoding for the Gal4-estrogen receptor-VP16 (GEV) chimeric protein into the *leu2Δ0*  
380 locus [45]. S288C yeast strains expressing either Abp1p-RFP or Abp140-3xGFP were a  
381 kind gift from Dr. Bruce Goode (Brandeis University).

382 To create the *wBm0076-mRuby2* expressing pYES2NTA plasmid, the *yomRuby2* gene  
383 was amplified from the plasmid pFA6a-link-*yomRuby2*-SpHis5 [78] using primers 5'-  
384 AGCTTTTCTTATAAAACAATTGATGGTGTCCAAAGGAGAGGAG and 5'-  
385 AGGGATAGGCTTAGCTGCAATTTACTTATAACAATTCATCCATA, containing homology  
386 to both the C-terminus of the *wBm0076* gene and the pYES2NTA-*wBm0076* vector.  
387 BY4742-pAGL was co-transformed with pYES2NTA-*wBm0076*, previously digested with  
388 PmeI, and the *mRuby2* amplicon and were plated to CSM-uracil to select for gap-  
389 repaired plasmids. Transformants were screened for red fluorescence via microscopy.  
390 All plasmid clones were purified and sequenced for confirmation (Eton Bioscience Inc.)

## 391 **Microscopy**

392  $\beta$ -estradiol responsive yeast strains harboring indicated plasmids were grown to  
393 saturation overnight in selective medium at 30°C, subcultured to fresh media with or  
394 without 1  $\mu$ M  $\beta$ -estradiol and grown for an additional 5 hours. After 5 hours, the entire

395 culture was harvested via centrifugation and cell pellets suspended in 50  $\mu$ L sterile  
396 water. Cell suspensions were mounted to slides pre-treated with a 1:1 mixture of  
397 polylysine (10% w/v): concanavalin A (2 mg/ml) solution. Cells were visualized using a  
398 Nikon Ti-U fluorescence microscope, and images were processed using the Fiji  
399 software package [79, 80].

400 To measure endocytosis dynamics via TIRF microscopy,  $\beta$ -estradiol responsive yeast  
401 strains harboring the indicated fluorescent proteins were cultured overnight in selective  
402 media at 30°C. Saturated cultures were then subcultured to the same media either  
403 lacking, or containing, 1  $\mu$ M  $\beta$ -estradiol to induce wBm0076 expression for 5 h. Cells  
404 were mounted on coverslips pretreated with a 1:1 solution of concanavalin A (2 mg/ml)  
405 and 0.1% polylysine. For imaging, we used an Eclipse Ti-U microscope (Nikon)  
406 equipped with 60 $\times$  NA1.49 TIRF objective and through-the-objective TIRF illumination  
407 provided by a 40-mW 488-nm and a 75-mW 561-nm diode laser (Spectraphysics) as  
408 previously described [82]. The excitation lasers were cleaned up with a Nikon  
409 GFP/mCherry TIRF filter cube and the emission was separated using an Image Splitting  
410 Device (Photometrics DualView2 with filter cube 11-EM). Images were recorded at 10  
411 fps using an iXON3 (Andor) and the NIS-Elements Advanced Research software  
412 (Nikon). Frames were assembled into movies and kymograms describing individual  
413 patch dynamics were generated using the Fiji distribution of ImageJ (v.1.48s).

414

415 **Pulldowns**

416 Yeast strains were cultured overnight in CSM selective media to saturation at 30°C.  
417 Cells were then harvested via centrifugation (3000 x *g*, 5 min, room temperature),  
418 resuspended in either YP or CSM-uracil medium containing 2% galactose, and grown  
419 for an additional 6 hours at 30°C. 100 OD<sub>600</sub> units were harvested from each condition  
420 via centrifugation. Cells were then resuspended with ice-cold 1x PBS buffer with 1mM  
421 PMSF and protease inhibitor cocktail. Cells were harvested again via centrifugation at  
422 7000rpm for 1min (4°C). The resultant supernatant was discarded, and the cell pellet  
423 was frozen in liquid nitrogen. The cells were thawed and resuspended again in ice-cold  
424 1x PBS buffer (1 mM PMSF, 1x PIC, and 1% (v/v) Triton X-100). Acid-washed glass  
425 beads (0.5 μ) were then added to slurry and the cells were mechanically disrupted  
426 with a Mini-Beadbeater (Biospec Products) at 4°C for 20 sec, then placed on ice for 1  
427 min (7 cycles). The lysate was nutated for 1 hour at 4°C, and insoluble material was  
428 cleared by centrifugation (21000 x *g*, 15 min, 4°C). Cleared lysate was then loaded unto  
429 pre-washed Glutathione agarose resin and nutated for 5 hours at 4°C. Beads were  
430 washed 5 times with 1x PBS buffer containing 1mM PMSF, 1x PIC, and 1% Triton X-  
431 100. The beads were boiled in 1x SDS loading buffer to release bound protein before  
432 western blotting.

### 433 **Statistical analysis**

434 Statistical analysis was performed within the Prism software package (GraphPad  
435 Software, v. 6.0b). Column statistics were performed via a 1-way ANOVA Repeated  
436 Measures test and Holm-Bonferroni post-test. Where noted in figures, ns =  $P > 0.05$   
437 (not significant); (\*) =  $P \leq 0.05$ ; (\*\*) =  $P \leq 0.01$ ; (\*\*\*\*) =  $P \leq 0.0001$ .

438 **Acknowledgments.** The authors would like to thank Drs. Bruce Goode and Derek  
439 Prosser for providing essential reagents. pLact-C2-GFP-p416 was a gift from Sergio  
440 Grinstein (Addgene plasmid # 22853). M.K.M. is an ARCS Foundation Scholar, and  
441 V.J.S. is supported in part by a grant from the National Institute of Allergy and Infectious  
442 Diseases (R01-AI100913) and the University of Georgia Department of Microbiology.  
443 K.F.L. is supported by a grant from the National Institutes of Health (R01-GM110413).  
444 The content is solely the responsibility of the authors and does not necessarily represent  
445 the official views of the National Institutes of Health. The Authors have no conflicts of  
446 interest to declare.

## 447 References

- 448 1. Michael E, Bundy DAP, Grenfell BT. Re-assessing the global prevalence and  
449 distribution of lymphatic filariasis. *Parasitology*. 1996;112(4):409-28. Epub 2009/04/06.  
450 doi: 10.1017/S0031182000066646.
- 451
- 452 2. Babu S, Nutman TB. Immunopathogenesis of lymphatic filarial disease.  
453 *Seminars in immunopathology*. 2012;34(6):847-61. doi: 10.1007/s00281-012-0346-4.  
454 PubMed PMID: PMC3498535.
- 455
- 456 3. Stolk WA, Kulik MC, le Rutte EA, Jacobson J, Richardus JH, de Vlas SJ, et al.  
457 Between-Country Inequalities in the Neglected Tropical Disease Burden in 1990 and  
458 2010, with Projections for 2020. *PLoS neglected tropical diseases*.  
459 2016;10(5):e0004560. doi: 10.1371/journal.pntd.0004560.
- 460
- 461 4. Ramaiah KD, Ottesen EA. Progress and impact of 13 years of the global  
462 programme to eliminate lymphatic filariasis on reducing the burden of filarial disease.  
463 *PLoS neglected tropical diseases*. 2014;8(11):e3319. Epub 2014/11/21. doi:  
464 10.1371/journal.pntd.0003319. PubMed PMID: 25412180; PubMed Central PMCID:  
465 PMC4239120.
- 466
- 467 5. Lymphatic filariasis <http://www.who.int/mediacentre/factsheets/fs102/en/>: World  
468 Health Organization; 2017 [updated March 2017; cited 2017 May 17]. Available from:  
469 <http://www.who.int/mediacentre/factsheets/fs102/en/>.
- 470
- 471 6. Ottesen EA, Duke BO, Karam M, Behbehani K. Strategies and tools for the  
472 control/elimination of lymphatic filariasis. *Bulletin of the World Health Organization*.  
473 1997;75(6):491-503. PubMed PMID: 9509621.
- 474
- 475 7. Hoerauf A, Pfarr K, Mand S, Debrah AY, Specht S. Filariasis in Africa—treatment  
476 challenges and prospects. *Clinical Microbiology and Infection*. 2011;17(7):977-85. doi:  
477 <https://doi.org/10.1111/j.1469-0691.2011.03586.x>.
- 478
- 479 8. Ottesen EA. The global programme to eliminate lymphatic filariasis. *Tropical  
480 medicine & international health : TM & IH*. 2000;5(9):591-4. Epub 2000/10/24. doi:  
481 10.1046/j.1365-3156.2000.00620.x. PubMed PMID: 11044272.
- 482
- 483 9. Remme JHF, Feenstra P, Lever PR, Medici AC, Morel CM, Noma M, et al.  
484 Tropical Diseases Targeted for Elimination: Chagas Disease, Lymphatic Filariasis,  
485 Onchocerciasis, and Leprosy. In: nd, Jamison DT, Breman JG, Measham AR, Alleyne  
486 G, Claeson M, et al., editors. *Disease Control Priorities in Developing Countries*.  
487 Washington (DC): World Bank
- 488 The International Bank for Reconstruction and Development/The World Bank Group.;  
489 2006.
- 490

- 491 10. Johnston KL, Ford L, Taylor MJ. Overcoming the challenges of drug discovery for  
492 neglected tropical diseases: the A.WOL experience. *Journal of biomolecular screening*.  
493 2014;19(3):335-43. Epub 2013/11/19. doi: 10.1177/1087057113511270. PubMed PMID:  
494 24241712.
- 495
- 496 11. McLaren DJ, Worms MJ, Laurence BR, Simpson MG. Micro-organisms in filarial  
497 larvae (Nematoda). *Trans R Soc Trop Med Hyg*. 1975;69(5-6):509-14. Epub  
498 1975/01/01. doi: 10.1016/0035-9203(75)90110-8. PubMed PMID: 1228988.
- 499 12. Vincent AL, Ash LR, Frommes SP. The ultrastructure of adult *Brugia malayi*  
500 (*Brug*, 1927) (Nematoda: Filarioidea). *J Parasitol*. 1975;61(3):499-512. PubMed PMID:  
501 1138041.
- 502
- 503 13. Kozek WJ. Transovarially-transmitted intracellular microorganisms in adult and  
504 larval stages of *Brugia malayi*. *J Parasitol*. 1977;63. doi: 10.2307/3279832.
- 505
- 506 14. Sironi M, Bandi C, Sacchi L, Di Sacco B, Damiani G, Genchi C. Molecular  
507 evidence for a close relative of the arthropod endosymbiont *Wolbachia* in a filarial worm.  
508 *Mol Biochem Parasitol*. 1995;74(2):223-7. Epub 1995/11/01. doi: 10.1016/0166-  
509 6851(95)02494-8. PubMed PMID: 8719164.
- 510
- 511 15. Bandi C, Anderson TJ, Genchi C, Blaxter ML. Phylogeny of *Wolbachia* in filarial  
512 nematodes. *Proceedings Biological sciences*. 1998;265(1413):2407-13. doi:  
513 10.1098/rspb.1998.0591. PubMed PMID: 9921679.
- 514
- 515 16. Taylor MJ, Bilo K, Cross HF, Archer JP, Underwood AP. 16S rDNA phylogeny  
516 and ultrastructural characterization of *Wolbachia* intracellular bacteria of the filarial  
517 nematodes *Brugia malayi*, *B. pahangi*, and *Wuchereria bancrofti*. *Experimental*  
518 *parasitology*.  
519 1999;91(4):356-61. Epub 1999/03/27. doi: 10.1006/expr.1998.4383. PubMed PMID:  
520 10092480.
- 521
- 522 17. Bosshardt SC, McCall JW, Coleman SU, Jones KL, Petit TA, Klei TR.  
523 Prophylactic Activity of Tetracycline against *Brugia pahangi* Infection in Jirds (*Meriones*  
524 *unguiculatus*). *The Journal of Parasitology*. 1993;79(5):775-7. doi: 10.2307/3283620.
- 525
- 526 18. Bandi C, McCall JW, Genchi C, Corona S, Venco L, Sacchi L. Effects of  
527 tetracycline on the filarial worms *Brugia pahangi* and *Dirofilaria immitis* and their  
528 bacterial endosymbionts *Wolbachia*. Note: Nucleotide sequence data reported in  
529 this paper are available in the *embl*, *GeneBank*™ and *DDJB* databases under  
530 accession number AJ012646. *International journal for parasitology*. 1999;29(2):357-64.  
531 doi: [https://doi.org/10.1016/S0020-7519\(98\)00200-8](https://doi.org/10.1016/S0020-7519(98)00200-8).
- 532
- 533 19. Hoerauf A, Nissen-Pahle K, Schmetz C, Henkle-Duhrsen K, Blaxter ML, Buttner  
534 DW, et al. Tetracycline therapy targets intracellular bacteria in the filarial nematode  
535 *Litomosoides sigmodontis* and results in filarial infertility. *The Journal of clinical*

- 536 investigation. 1999;103(1):11-8. Epub 1999/01/12. doi: 10.1172/jci4768. PubMed PMID:  
537 9884329; PubMed Central PMCID: PMC407866.
- 538
- 539 20. Supali T, Djuardi Y, Pfarr KM, Wibowo H, Taylor MJ, Hoerauf A, et al.  
540 Doxycycline Treatment of *Brugia malayi*—Infected Persons Reduces Microfilaremia and  
541 Adverse Reactions after Diethylcarbamazine and Albendazole Treatment. *Clinical*  
542 *Infectious Diseases*. 2008;46(9):1385-93. doi: 10.1086/586753.
- 543
- 544 21. Landmann F, Voronin D, Sullivan W, Taylor MJ. Anti-filarial Activity of Antibiotic  
545 Therapy Is Due to Extensive Apoptosis after *Wolbachia* Depletion from Filarial  
546 Nematodes. *PLOS Pathogens*. 2011;7(11):e1002351. doi:  
547 10.1371/journal.ppat.1002351.
- 548
- 549 22. Masui S, Sasaki T, Ishikawa H. Genes for the type IV secretion system in an  
550 intracellular symbiont, *Wolbachia*, a causative agent of various sexual alterations in  
551 arthropods. *Journal of bacteriology*. 2000;182(22):6529-31. Epub 2000/10/29. PubMed  
552 PMID: 11053403; PubMed Central PMCID: PMC94805.
- 553 23. Rances E, Voronin D, Tran-Van V, Mavingui P. Genetic and functional  
554 characterization of the type IV secretion system in *Wolbachia*. *Journal of bacteriology*.  
555 2008;190. doi: 10.1128/jb.00377-08.
- 556
- 557 24. Pichon S, Bouchon D, Cordaux R, Chen L, Garrett RA, Grève P. Conservation of  
558 the Type IV Secretion System throughout *Wolbachia* evolution. *Biochemical and*  
559 *Biophysical Research Communications*. 2009;385(4):557-62. doi:  
560 <https://doi.org/10.1016/j.bbrc.2009.05.118>.
- 561
- 562 25. Foster J, Ganatra M, Kamal I, Ware J, Makarova K, Ivanova N, et al. The  
563 *Wolbachia* Genome of *Brugia malayi*: Endosymbiont Evolution within a Human  
564 Pathogenic Nematode. *PLoS Biol*. 2005;3(4):e121. doi: 10.1371/journal.pbio.0030121.
- 565
- 566 26. Voronin D, Guimarães AF, Molyneux GR, Johnston KL, Ford L, Taylor MJ.  
567 *Wolbachia* lipoproteins: abundance, localisation and serology of *Wolbachia*  
568 peptidoglycan associated lipoprotein and the Type IV Secretion System component,  
569 VirB6 from *Brugia malayi* and *Aedes albopictus*. *Parasites & Vectors*. 2014;7(1):462.  
570 doi: 10.1186/s13071-014-0462-1.
- 571
- 572 27. Whitaker N, Berry TM, Rosenthal N, Gordon JE, Gonzalez-Rivera C, Sheehan  
573 KB, et al. Chimeric Coupling Proteins Mediate Transfer of Heterologous Type IV  
574 Effectors through the *Escherichia coli* pKM101-Encoded Conjugation Machine. *J*  
575 *Bacteriol*. 2016;198(19):2701-18. Epub 2016/07/20. doi: 10.1128/JB.00378-16. PubMed  
576 PMID: 27432829; PubMed Central PMCID: PMC5019051.
- 577
- 578 28. Melnikow E, Xu S, Liu J, Bell AJ, Ghedin E, Unnasch TR, et al. A Potential Role  
579 for the Interaction of *Wolbachia* Surface Proteins with the *Brugia malayi* Glycolytic  
580 Enzymes and Cytoskeleton in Maintenance of Endosymbiosis. *PLoS neglected tropical*  
581 *diseases*. 2013;7(4):e2151. doi: 10.1371/journal.pntd.0002151.



- 582  
583 29. Melnikow E, Xu S, Liu J, Li L, Oksov Y, Ghedin E, et al. Interaction of a  
584 Wolbachia WSP-like protein with a nuclear-encoded protein of *Brugia malayi*. *Int J*  
585 *Parasitol.* 2011;41(10):1053-61. doi: 10.1016/j.ijpara.2011.05.008. PubMed PMID:  
586 21782817; PubMed Central PMCID: PMC3160744.  
587
- 588 30. Carpinone EM, Li Z, Mills MK, Foltz C, Brannon ER, Carlow CKS, et al.  
589 Identification of putative effectors of the Type IV secretion system from the Wolbachia  
590 endosymbiont of *Brugia malayi*. *PLOS ONE.* 2018;13(9):e0204736. doi:  
591 10.1371/journal.pone.0204736.  
592
- 593 31. Machesky LM, Insall RH. Scar1 and the related Wiskott-Aldrich syndrome  
594 protein, WASP, regulate the actin cytoskeleton through the Arp2/3 complex. *Current*  
595 *biology : CB.* 1998;8(25):1347-56. Epub 1999/01/16. PubMed PMID: 9889097.  
596
- 597 32. Mullins RD, Heuser JA, Pollard TD. The interaction of Arp2/3 complex with actin:  
598 nucleation, high affinity pointed end capping, and formation of branching networks of  
599 filaments. *Proc Natl Acad Sci U S A.* 1998;95(11):6181-6. PubMed PMID: 9600938;  
600 PubMed Central PMCID: PMC27619.  
601
- 602 33. Higgs HN, Pollard TD. Regulation of Actin Polymerization by Arp2/3 Complex  
603 and WASP/Scar Proteins. *Journal of Biological Chemistry.* 1999;274(46):32531-4. doi:  
604 10.1074/jbc.274.46.32531.  
605
- 606 34. Jeng RL, Goley ED, D'Alessio JA, Chaga OY, Svitkina TM, Borisy GG, et al. A  
607 Rickettsia WASP-like protein activates the Arp2/3 complex and mediates actin-based  
608 motility. *Cellular microbiology.* 2004;6(8):761-9. doi: 10.1111/j.1462-5822.2004.00402.x.  
609 PubMed PMID: 15236643.  
610
- 611 35. Naqvi SN, Zahn R, Mitchell DA, Stevenson BJ, Munn AL. The WASp homologue  
612 Las17p functions with the WIP homologue End5p/verprolin and is essential for  
613 endocytosis in yeast. *Current Biology.* 1998;8(17):959-S3. doi:  
614 [https://doi.org/10.1016/S0960-9822\(98\)70396-3](https://doi.org/10.1016/S0960-9822(98)70396-3).  
615
- 616 36. Tsuboi S, Meerloo J. Wiskott-Aldrich Syndrome Protein Is a Key Regulator of the  
617 Phagocytic Cup Formation in Macrophages. *Journal of Biological Chemistry.*  
618 2007;282(47):34194-203. doi: <https://doi.org/10.1074/jbc.M705999200>.  
619
- 620 37. Landmann F, Bain O, Martin C, Uni S, Taylor MJ, Sullivan W. Both asymmetric  
621 mitotic segregation and cell-to-cell invasion are required for stable germline  
622 transmission of *Wolbachia* in filarial nematodes. *Biology Open.* 2012;1(6):536-47. doi:  
623 10.1242/bio.2012737.  
624
- 625 38. White PM, Pietri JE, Debec A, Russell S, Patel B, Sullivan W. Mechanisms of  
626 Horizontal Cell-to-Cell Transfer of *Wolbachia* spp. in *Drosophila melanogaster*. *Applied*  
627 *and environmental microbiology.* 2017;83(7):e03425-16. doi: 10.1128/AEM.03425-16.  
628 PubMed PMID: 28087534.

- 628  
629 39. Degreif D, Cucu B, Budin I, Thiel G, Bertl A. Lipid determinants of endocytosis  
630 and exocytosis in budding yeast. *Biochimica et Biophysica Acta (BBA) - Molecular and*  
631 *Cell Biology of Lipids*. 2019;1864(7):1005-16. doi:  
632 <https://doi.org/10.1016/j.bbalip.2019.03.007>.  
633
- 634 40. Kaksonen M, Toret CP, Drubin DG. A Modular Design for the Clathrin- and Actin-  
635 Mediated Endocytosis Machinery. *Cell*. 2005;123(2):305-20. doi:  
636 <https://doi.org/10.1016/j.cell.2005.09.024>.  
637
- 638 41. Gagny B, Wiederkehr A, Dumoulin P, Winsor B, Riezman H, Haguenaer-Tsapir  
639 R. A novel EH domain protein of *Saccharomyces cerevisiae*, Ede1p, involved in  
640 endocytosis. *Journal of cell science*. 2000;113(18):3309-19. doi:  
641 10.1242/jcs.113.18.3309.  
642
- 643 42. Dewar H, Warren DT, Gardiner FC, Gourlay CG, Satish N, Richardson MR, et al.  
644 Novel proteins linking the actin cytoskeleton to the endocytic machinery in  
645 *Saccharomyces cerevisiae*. *Mol Biol Cell*. 2002;13(10):3646-61. doi: 10.1091/mbc.E02-  
646 05-0262. PubMed PMID: 12388763; PubMed Central PMCID: PMC129972.  
647
- 648 43. Goodman A, Goode BL, Matsudaira P, Fink GR. The *Saccharomyces cerevisiae*  
649 calponin/transgelin homolog Scp1 functions with fimbrin to regulate stability and  
650 organization of the actin cytoskeleton. *Molecular biology of the cell*. 2003;14(7):2617-29.  
651 Epub 2003/04/04. doi: 10.1091/mbc.e03-01-0028. PubMed PMID: 12857851.  
652
- 653 44. Quintero-Monzon O, Rodal AA, Strokopytov B, Almo SC, Goode BL. Structural  
654 and Functional Dissection of the Abp1 ADFH Actin-binding Domain Reveals Versatile In  
655 Vivo Adapter Functions. *Molecular Biology of the Cell*. 2005;16(7):3128-39. doi:  
656 10.1091/mbc.E05-01-0059. PubMed PMID: PMC1165398.  
657
- 658 45. Louvion JF, Havaux-Copf B, Picard D. Fusion of GAL4-VP16 to a steroid-binding  
659 domain provides a tool for gratuitous induction of galactose-responsive genes in yeast.  
660 *Gene*. 1993;131(1):129-34. Epub 1993/09/06. PubMed PMID: 8370533.  
661 46. Quintero MJ, Maya D, Arévalo-Rodríguez M, Cebolla Á, Chávez S. An improved  
662 system for estradiol-dependent regulation of gene expression in yeast. *Microbial Cell*  
663 *Factories*. 2007;6:10-. doi: 10.1186/1475-2859-6-10. PubMed PMID: PMC1831787.  
664
- 665 47. Miki H, Takenawa T. Direct binding of the verprolin-homology domain in N-WASP  
666 to actin is essential for cytoskeletal reorganization. *Biochem Biophys Res Commun*.  
667 1998;243(1):73-8. Epub 1998/02/25. doi: 10.1006/bbrc.1997.8064. PubMed PMID:  
668 9473482.  
669
- 670 48. Kelly AE, Kranitz H, Dötsch V, Mullins RD. Actin Binding to the Central Domain of  
671 WASP/Scar Proteins Plays a Critical Role in the Activation of the Arp2/3 Complex. *The*  
672 *Journal of biological chemistry*. 2006;281(15):10589-97. doi: 10.1074/jbc.M507470200.  
673 PubMed PMID: PMC3077991.

- 674  
675 49. Marchand JB, Kaiser DA, Pollard TD, Higgs HN. Interaction of WASP/Scar  
676 proteins with actin and vertebrate Arp2/3 complex. *Nature Cell Biology*. 2001;3(1):76-  
677 82. PubMed PMID: 11146629.  
678
- 679 50. Rohatgi R, Ho HY, Kirschner MW. Mechanism of N-WASP activation by CDC42  
680 and phosphatidylinositol 4, 5-bisphosphate. *The Journal of Cell Biology*.  
681 2000;150(6):1299-310. doi: 10.1083/jcb.150.6.1299. PubMed PMID: 10995436;  
682 PubMed Central PMCID: PMC2150699.  
683
- 684 51. Moreau V, Frischknecht F, Reckmann I, Vincentelli R, Rabut G, Stewart D, et al.  
685 A complex of N-WASP and WIP integrates signalling cascades that lead to actin  
686 polymerization. *Nat Cell Biol*. 2000;2(7):441-8. doi: 10.1038/35017080. PubMed PMID:  
687 10878810.  
688
- 689 52. C Panchal S, Kaiser D, Torres E, D Pollard T, K Rosen M. A conserved  
690 amphipathic helix in WASP/Scar proteins is essential for activation of Arp2/3  
691 complex2003. 591-8 p.  
692
- 693 53. Asakura T, Sasaki T, Nagano F, Satoh A, Obaishi H, Nishioka H, et al. Isolation  
694 and characterization of a novel actin filament-binding protein from *Saccharomyces*  
695 *cerevisiae*. *Oncogene*. 1998;16(1):121-30. Epub 1998/02/19. doi:  
696 10.1038/sj.onc.1201487. PubMed PMID: 9467951.  
697
- 698 54. Sasahara Y, Rachid R, Byrne MJ, de la Fuente MA, Abraham RT, Ramesh N, et  
699 al. Mechanism of Recruitment of WASP to the Immunological Synapse and of Its  
700 Activation Following TCR Ligation. *Molecular Cell*. 2002;10(6):1269-81. doi:  
701 [https://doi.org/10.1016/S1097-2765\(02\)00728-1](https://doi.org/10.1016/S1097-2765(02)00728-1).  
702
- 703 55. Burianek LE, Soderling SH. Under lock and key: spatiotemporal regulation of  
704 WASP family proteins coordinates separate dynamic cellular processes. *Seminars in*  
705 *cell & developmental biology*. 2013;24(4):258-66. Epub 20130103. doi:  
706 10.1016/j.semcd.2012.12.005. PubMed PMID: 23291261; PubMed Central PMCID:  
707 PMC3656410.  
708
- 709 56. Andersen MH, Graversen H, Fedosov SN, Petersen TE, Rasmussen JT.  
710 Functional analyses of two cellular binding domains of bovine lactadherin. *Biochemistry*.  
711 2000;39(20):6200-6. doi: 10.1021/bi992221r. PubMed PMID: 10821695.  
712
- 713 57. Goode BL, Rodal AA, Barnes G, Drubin DG. Activation of the Arp2/3 complex by  
714 the actin filament binding protein Abp1p. *The Journal of Cell Biology*. 2001;153(3):627-  
715 34. doi: 10.1083/jcb.153.3.627. PubMed PMID: 11331312.
- 716 58. Freeman NL, Lila T, Mintzer KA, Chen Z, Pahk AJ, Ren R, et al. A conserved  
717 proline-rich region of the *Saccharomyces cerevisiae* cyclase-associated protein binds  
718 SH3 domains and modulates cytoskeletal localization. *Molecular and cellular biology*.

- 719 1996;16(2):548-56. Epub 1996/02/01. PubMed PMID: 8552082; PubMed Central  
720 PMCID: PMC231033.  
721
- 722 59. Fazi B, Cope MJTV, Douangamath A, Ferracuti S, Schirwitz K, Zucconi A, et al.  
723 Unusual Binding Properties of the SH3 Domain of the Yeast Actin-binding Protein Abp1:  
724 STRUCTURAL AND FUNCTIONAL ANALYSIS\*. *Journal of Biological Chemistry*.  
725 2002;277(7):5290-8. doi: <https://doi.org/10.1074/jbc.M109848200>.  
726
- 727 60. Kessels MM, Engqvist-Goldstein ÅEY, Drubin DG, Qualmann B. Mammalian  
728 Abp1, a Signal-Responsive F-Actin-Binding Protein, Links the Actin Cytoskeleton to  
729 Endocytosis via the Gtpase Dynamin. *Journal of Cell Biology*. 2001;153(2):351-66. doi:  
730 10.1083/jcb.153.2.351.  
731
- 732 61. Skruzny M, Brach T, Ciuffa R, Rybina S, Wachsmuth M, Kaksonen M. Molecular  
733 basis for coupling the plasma membrane to the actin cytoskeleton during clathrin-  
734 mediated endocytosis. *Proceedings of the National Academy of Sciences of the United*  
735 *States of America*. 2012;109(38):E2533-E42. doi: 10.1073/pnas.1207011109. PubMed  
736 PMID: PMC3458359.  
737
- 738 62. Tyler JJ, Allwood EG, Ayscough KR. WASP family proteins, more than Arp2/3  
739 activators. *Biochem Soc Trans*. 2016;44(5):1339-45. Epub 2016/12/03. doi:  
740 10.1042/bst20160176. PubMed PMID: 27911716; PubMed Central PMCID:  
741 PMC5095904.  
742
- 743 63. Martinez-Quiles N, Rohatgi R, Antón IM, Medina M, Saville SP, Miki H, et al. WIP  
744 regulates N-WASP-mediated actin polymerization and filopodium formation. *Nat Cell*  
745 *Biol*. 2001;3(5):484-91. doi: 10.1038/35074551. PubMed PMID: 11331876.  
746
- 747 64. Chou H-C, Antón IM, Holt MR, Curcio C, Lanzardo S, Worth A, et al. WIP  
748 Regulates the Stability and Localization of WASP to Podosomes in Migrating Dendritic  
749 Cells. *Current Biology*. 2006;16(23):2337-44. doi: 10.1016/j.cub.2006.10.037.  
750
- 751 65. Zalevsky J, Grigorova I, Mullins RD. Activation of the Arp2/3 Complex by the  
752 *Listeria* ActA Protein: ActA BINDS TWO ACTIN MONOMERS AND THREE SUBUNITS  
753 OF THE Arp2/3 COMPLEX. *Journal of Biological Chemistry*. 2001;276(5):3468-75. doi:  
754 10.1074/jbc.M006407200.  
755
- 756 66. Gouin E, Egile C, Dehoux P, Villiers V, Adams J, Gertler F, et al. The RickA  
757 protein of *Rickettsia conorii* activates the Arp2/3 complex. *Nature*. 2004;427(6973):457-  
758 61. doi:  
759 [http://www.nature.com/nature/journal/v427/n6973/supinfo/nature02318\\_S1.html](http://www.nature.com/nature/journal/v427/n6973/supinfo/nature02318_S1.html).  
760
- 761 67. Tilney LG. PD. Actin filaments and the growth, movement, and spread of the  
762 intracellular bacterial parasite, *Listeria monocytogenes*. *The Journal of Cell Biology*.  
763 1989;109(4):1597-608. PubMed PMID: PMC2115783.  
764

- 765 68. Welch MD, Rosenblatt J, Skoble J, Portnoy DA, Mitchison TJ. Interaction of  
766 human Arp2/3 complex and the *Listeria monocytogenes* ActA protein in actin filament  
767 nucleation. *Science*. 1998;281(5373):105-8. Epub 1998/07/04. PubMed PMID:  
768 9651243.
- 769  
770 69. Goldberg MB. Actin-Based Motility of Intracellular Microbial Pathogens.  
771 *Microbiology and Molecular Biology Reviews*. 2001;65(4):595-626. doi:  
772 10.1128/MMBR.65.4.595-626.2001. PubMed PMID: PMC99042.
- 773 70. Fischer K, Beatty WL, Jiang D, Weil GJ, Fischer PU. Tissue and Stage-Specific  
774 Distribution of *Wolbachia* in *Brugia malayi*. *PLoS neglected tropical diseases*.  
775 2011;5(5):e1174. doi: 10.1371/journal.pntd.0001174.
- 776  
777 71. Fischer K, Beatty WL, Weil GJ, Fischer PU. High Pressure Freezing/Freeze  
778 Substitution Fixation Improves the Ultrastructural Assessment of *Wolbachia*  
779 Endosymbiont – Filarial Nematode Host Interaction. *PLOS ONE*. 2014;9(1):e86383. doi:  
780 10.1371/journal.pone.0086383.
- 781  
782 72. Chagas-Moutinho VA, Silva R, de Souza W, Motta MCM. Identification and  
783 ultrastructural characterization of the *Wolbachia* symbiont in *Litomosoides chagasfilhoi*.  
784 *Parasites & Vectors*. 2015;8(1):74. doi: 10.1186/s13071-015-0668-x.
- 785  
786 73. Shi X, Duan F, Lin L, Xu Q, Xu T, Zhang R. WIP-1 and DBN-1 promote scission  
787 of endocytic vesicles by bridging actin and Dynamin-1 in the *C. elegans* intestine.  
788 *Journal of cell science*. 2019;132(12). Epub 20190617. doi: 10.1242/jcs.228023.  
789 PubMed PMID: 31118234.
- 790  
791 74. Mise-Omata S, Montagne B, Deckert M, Wienands J, Acuto O. Mammalian actin  
792 binding protein 1 is essential for endocytosis but not lamellipodia formation: functional  
793 analysis by RNA interference. *Biochemical and Biophysical Research Communications*.  
794 2003;301(3):704-10. doi: [https://doi.org/10.1016/S0006-291X\(02\)02972-8](https://doi.org/10.1016/S0006-291X(02)02972-8).
- 795  
796 75. He K, Xing R, Yan X, Tian A, Zhang M, Yuan J, et al. Mammalian actin-binding  
797 protein 1/HIP-55 is essential for the scission of clathrin-coated pits by regulating  
798 dynamin-actin interaction. *The FASEB Journal*. 2015;29(6):2495-503. doi:  
799 <https://doi.org/10.1096/fj.14-264259>.
- 800  
801 76. Foray V, Pérez-Jiménez MM, Fattouh N, Landmann F. *Wolbachia* Control Stem  
802 Cell Behavior and Stimulate Germline Proliferation in Filarial Nematodes.  
803 *Developmental Cell*. 2018;45(2):198-211.e3. doi:  
804 <https://doi.org/10.1016/j.devcel.2018.03.017>.
- 805  
806 77. Chevignon G, Foray V, Pérez-Jiménez MM, Libro S, Chung M, Foster JM, et al.  
807 Dual RNAseq analyses at soma and germline levels reveal evolutionary innovations in  
808 the elephantiasis-agent *Brugia malayi*, and adaptation of its *Wolbachia* endosymbionts.  
809 *PLoS neglected tropical diseases*. 2021;15(1):e0008935. doi:  
810 10.1371/journal.pntd.0008935.

- 811  
812 78. Lee S, Lim WA, Thorn KS. Improved Blue, Green, and Red Fluorescent Protein  
813 Tagging Vectors for *S. cerevisiae*. PLOS ONE. 2013;8(7):e67902. doi:  
814 10.1371/journal.pone.0067902.  
815  
816 79. Schindelin J, Arganda-Carreras I, Frise E, Kaynig V, Longair M, Pietzsch T, et al.  
817 Fiji: an open-source platform for biological-image analysis. Nat Methods. 2012;9(7):676-  
818 82. Epub 2012/06/30. doi: 10.1038/nmeth.2019. PubMed PMID: 22743772; PubMed  
819 Central PMCID: PMC3855844.  
820  
821 80. Schneider CA, Rasband WS, Eliceiri KW. NIH Image to ImageJ: 25 years of  
822 image analysis. Nat Methods. 2012;9(7):671-5. Epub 2012/08/30. PubMed PMID:  
823 22930834; PubMed Central PMCID: PMC5554542.  
824  
825 81. Altschul SF, Madden TL, Schäffer AA, Zhang J, Zhang Z, Miller W, et al. Gapped  
826 BLAST and PSI-BLAST: a new generation of protein database search programs.  
827 Nucleic Acids Res. 1997;25(17):3389-402. doi: 10.1093/nar/25.17.3389. PubMed PMID:  
828 9254694; PubMed Central PMCID: PMC146917.  
829  
830 82. Lehtreck KF. Methods for studying movement of molecules within cilia. Methods  
831 Mol Biol. 2016; 1454:83-96. doi: 10.1007/978-1-4939-3789-9\_6. PubMed PMID:  
27514917; PubMed Central PMCID: PMC5269603.

832

## 833 **Figure Legends**

834 **Fig 1. Highly simplified model of Sce endocytic vesicle formation.** Cargo selection  
835 recruits early coat proteins (red, Ede1p) and clathrin to endocytic sites. Additional coat  
836 proteins are recruited (dark blue, Sla1/2p), then actin and actin polymerization  
837 machinery (Las17p, Abp1p). Additional actin polymerization is catalyzed by Sac6p, and  
838 vesicles are scissioned via Rvs161p activity. Residence times listed for each protein are  
839 based on [40].

## 840 **Fig 2. Wbm0076 disrupts late endocytic vesicle kinetics, but not site selection.**

841 Yeast strains harboring indicated GFP-tagged endocytic vesicle components, Abp1p-  
842 mCherry, and either pYES2/NT A (vector) or wBm0076 expression vector were induced  
843 for 5 h with 1  $\mu$ M  $\beta$ -estradiol. Cells were harvested, washed, and **(A)** visualized via  
844 epifluorescent microscopy. Right panels are corresponding strains without  $\beta$ -estradiol  
845 induction. White arrows point to coupled (vector) or uncoupled (wBm0076) phenotype.  
846 **(B)** The percentage of cells showing colocalized patches in Sla1GFP + Abp1RFP  
847 strains with vector or wBm0076 expression in **(A)** were calculated ( $n \geq 100$  cells, in  
848 triplicate). **(C)** Yeast strains harboring Sla1-GFP and Abp1-mCherry and either a vector  
849 control or wBm0076 were induced for 5h in 1 $\mu$ M  $\beta$ -estradiol and visualized via two-color  
850 TIRF microscopy over 352 s (3 frames/s). Arrows point to actin patch analyzed by  
851 corresponding kymograph. **(D)** Kymograms describing protein kinetics of all patches  
852 visualized in a single cell. Bar = 5  $\mu$ .

853 **Fig 3. Wbm0076 domain mutations modify toxic activity.** Yeast strains modified with  
854 GEV for  $\beta$ -estradiol-dependent induction of *GAL* promoters (Materials and Methods),  
855 expressing Abp140GFP and harboring a pYES2/NT A control plasmid or a pYES2/NT A  
856 plasmid containing *wBm0076* or mutant derivative were grown overnight in CSM  
857 medium lacking uracil. **(A)** Cultures were diluted to an  $OD_{600} = 1.0$  in sterile 0.9% NaCl,  
858 then spotted in 10-fold dilutions on plates containing or lacking 1  $\mu$ M  $\beta$ -estradiol. **(B)**  
859 Cells were subcultured to fresh CSM-ura containing or lacking 1  $\mu$ M  $\beta$ -estradiol. After 5  
860 h outgrowth at 30 °C, cells were harvested and visualized. Bar = 5  $\mu$ . Number of  
861 colocalized actin patches (white arrows) and standard deviation from norm per cell is  
862 noted and determined from three independent experiments:  $n \geq 100$  cells per  
863 experiment.  $P > 0.05$  (n.s.)

864 **Fig 4. Wbm0076 activity requires membrane association.** Yeast strains modified  
865 with GEV for  $\beta$ -estradiol-dependent induction of *GAL* promoters expressing Abp1RFP  
866 and harboring a pYES2/NT A control plasmid or a pYES2/NT A plasmid containing the  
867 indicated construct were grown overnight in CSM medium lacking uracil. **(A)** Cultures  
868 were diluted to an  $OD_{600} = 1.0$  in sterile 0.9% NaCl, then spotted in 10-fold dilutions on  
869 plates containing or lacking 1  $\mu$ M  $\beta$ -estradiol. **(B)** Cells were subcultured to fresh CSM-  
870 ura containing or lacking 1  $\mu$ M  $\beta$ -estradiol. After 5 h outgrowth at 30 °C, cells were  
871 harvested and visualized. Number of cells with colocalized actin patches (white arrows)  
872 and the standard deviation from the norm is noted and determined from three  
873 independent experiments:  $n \geq 100$  cells per experiment, bar = 5  $\mu$ .

874 **Fig 5. Wbm0076 coprecipitates with GST-Abp1p.** Protein extracts from indicated  
875 strains were generated and incubated with glutathione beads as in Materials and



876 Methods. Equal fractions of input and elution for each condition were separated via  
877 SDS-PAGE and immunoblotted with the indicated antibody (Anti-Xpress: Wbm0076;  
878 anti-GST, GST-Abp1). Due to the similarity in the sizes of GST-Abp1 and Wbm0076,  
879 two identical gels and membranes were probed with different primary antibodies.

880 **Fig 6. Wbm0076 is conserved among *Wolbachia* endosymbionts.** Protein  
881 sequences from the *Wolbachia* genus homologous to Wbm0076 (only 22 of 31 shown  
882 here) were identified via the Blastp suite [81] and are indicated with abbreviations of the  
883 species of origin. Sequence alignment of conserved domains are highlighted with a  
884 black box. TM = transmembrane; V = verprolin/WH2 domain; C = central domain; A =  
885 acidic domain; P/PP = polyproline motif. Species abbreviations and NCBI accession  
886 numbers for all 31 identified homologues are available in Fig S4.

887

## FIGURE 1

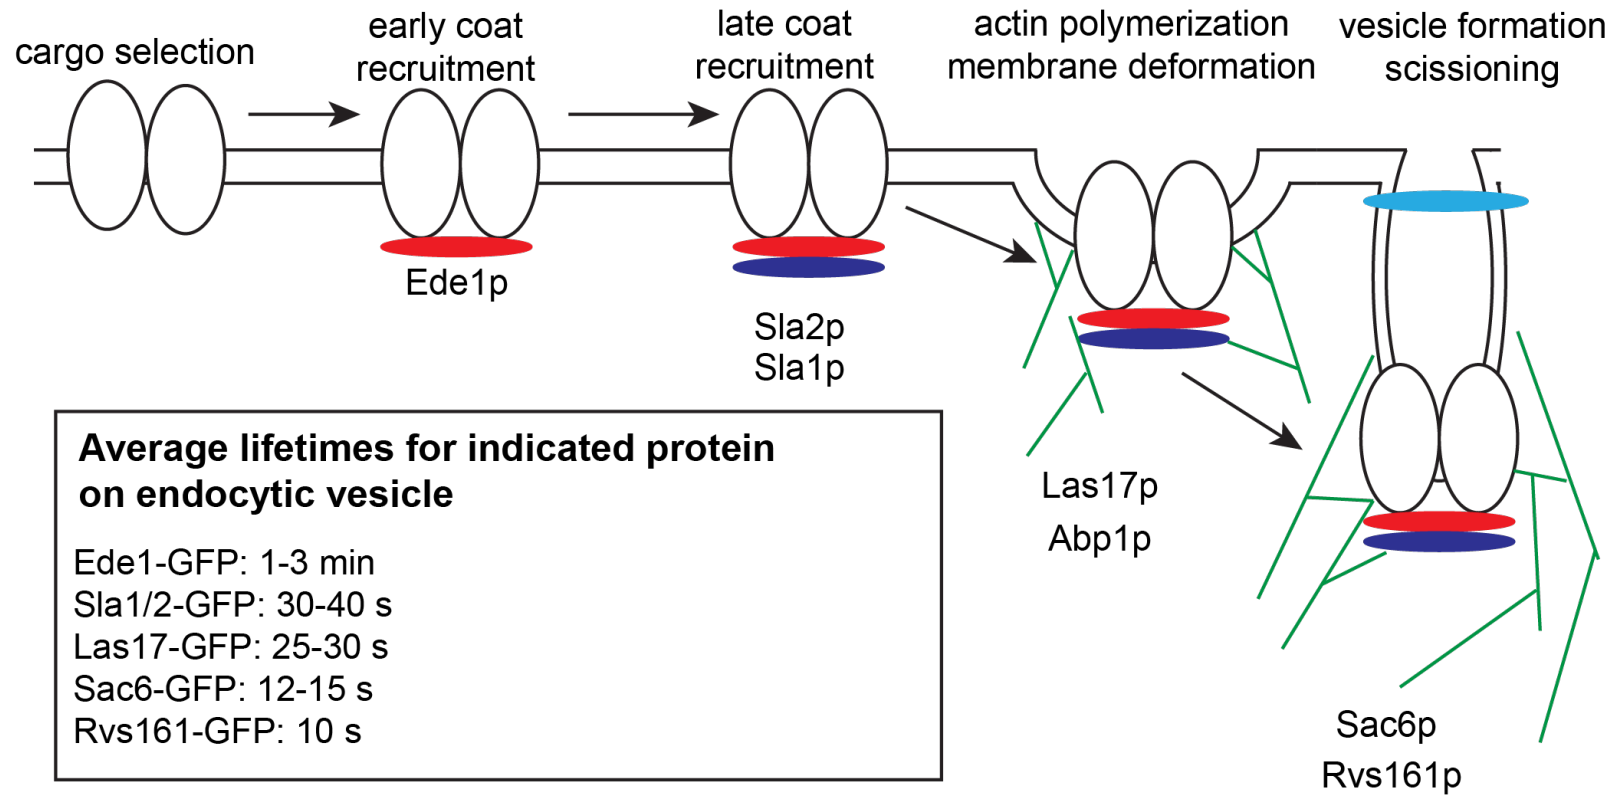

## FIGURE 2

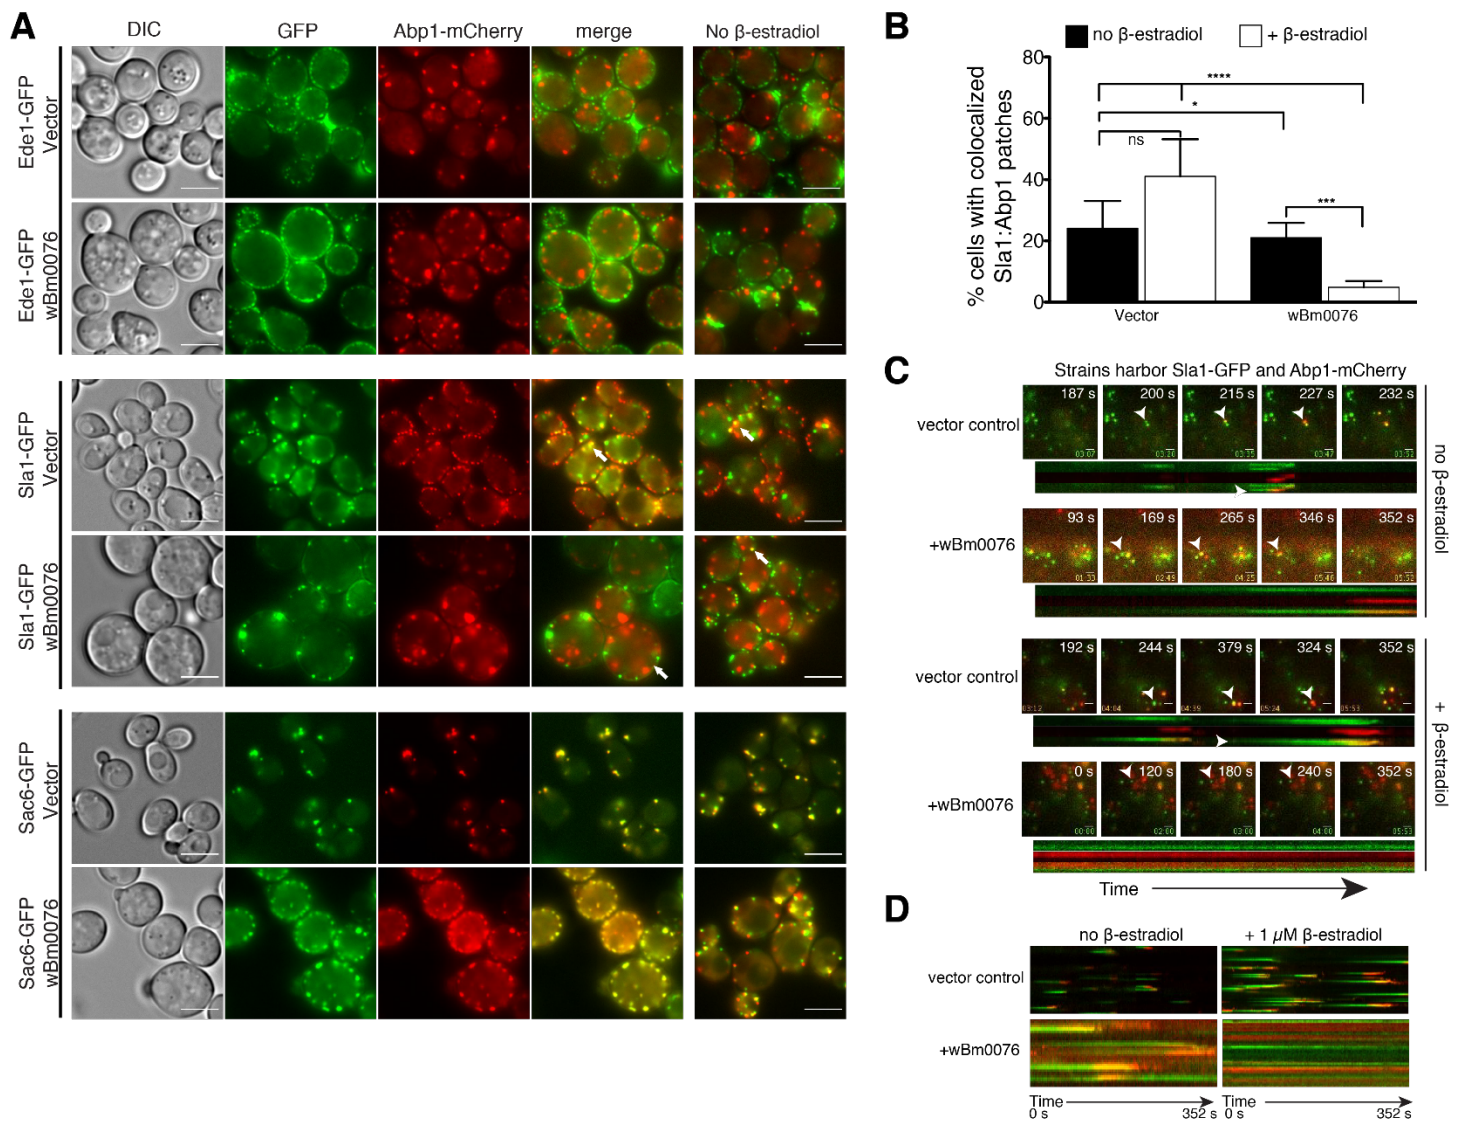

## FIGURE 3

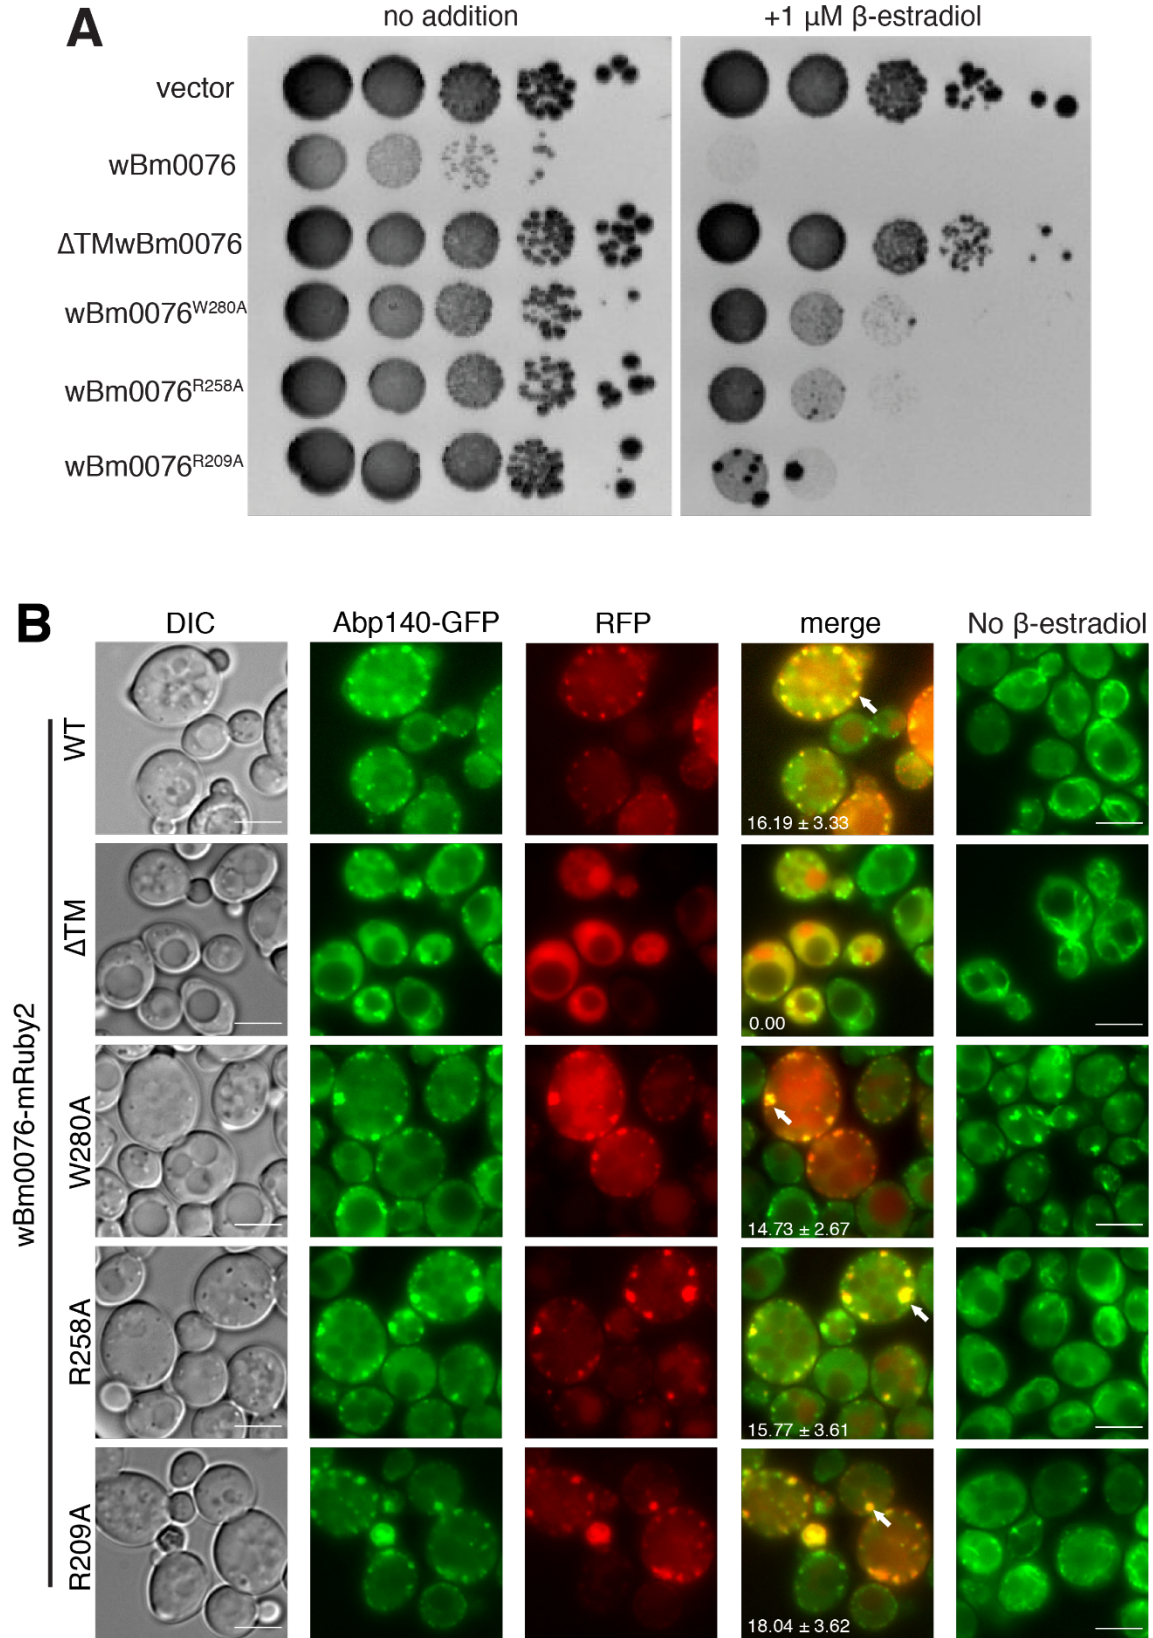

## FIGURE 4

**A**

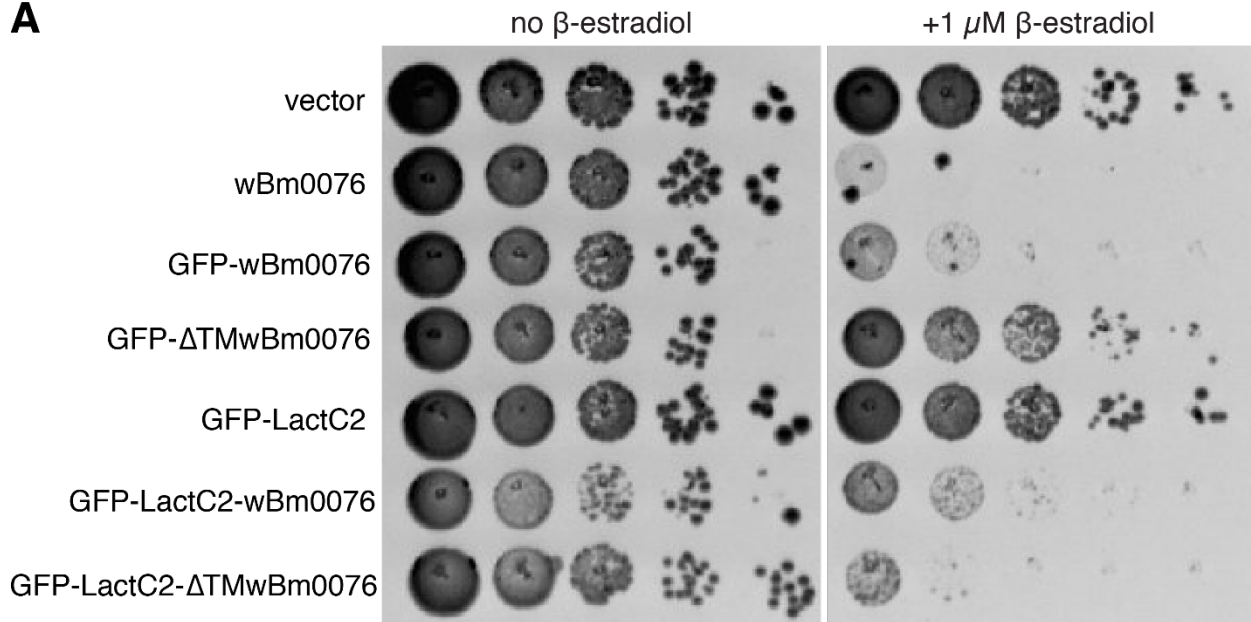

**B**

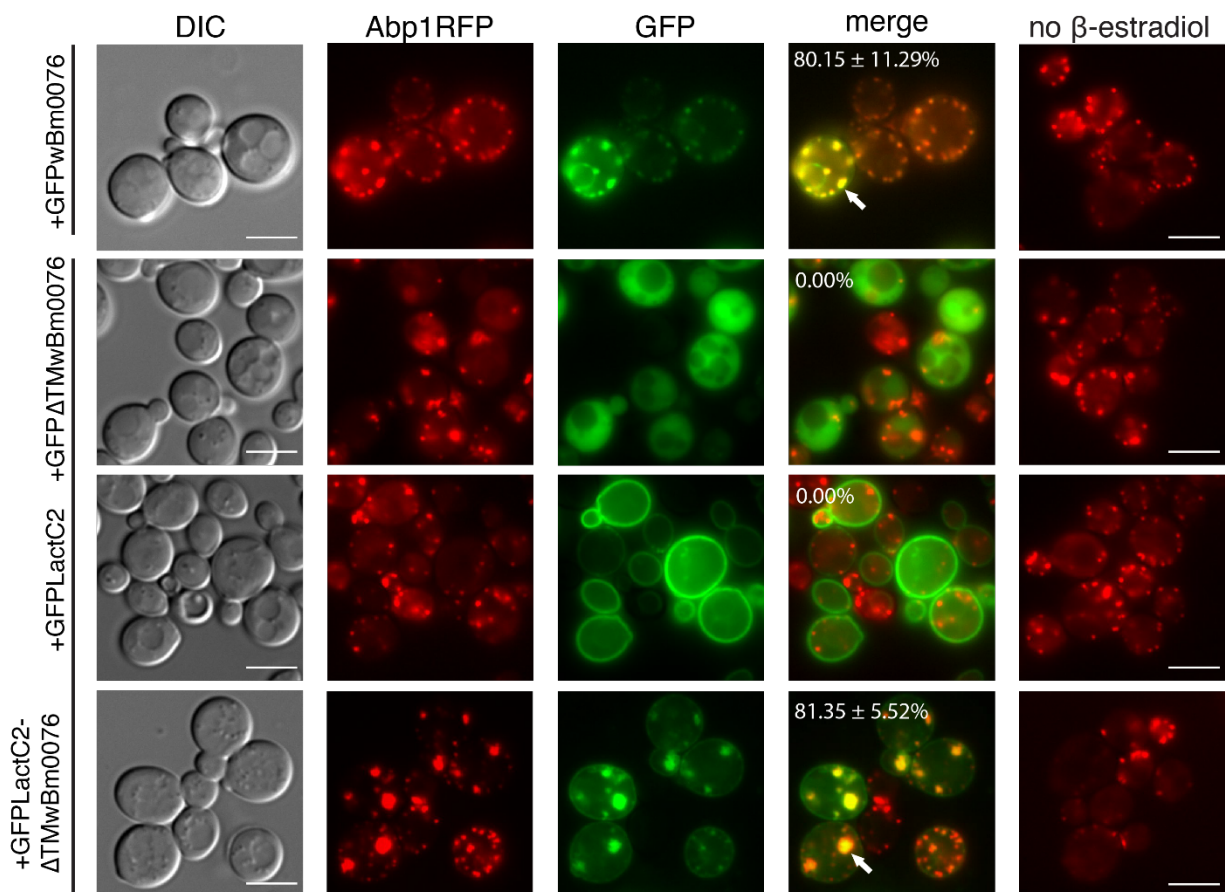

## FIGURE 5

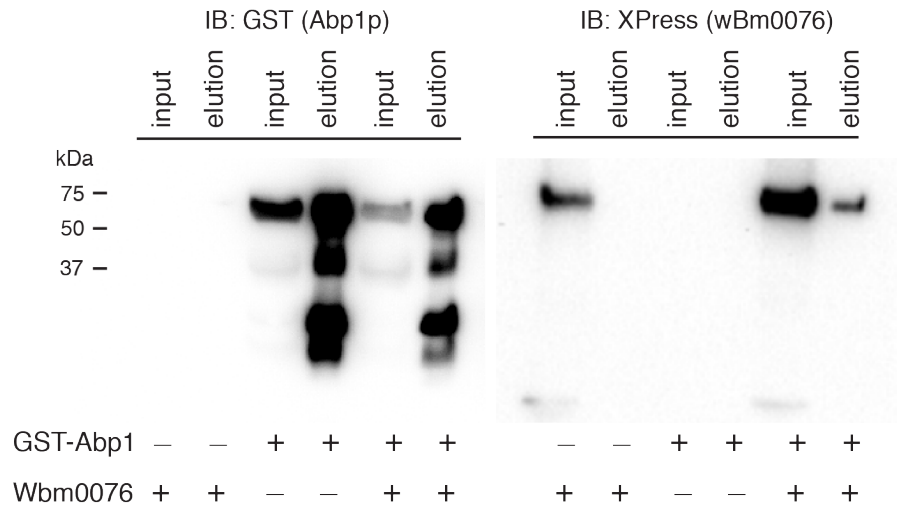

## FIGURE 6

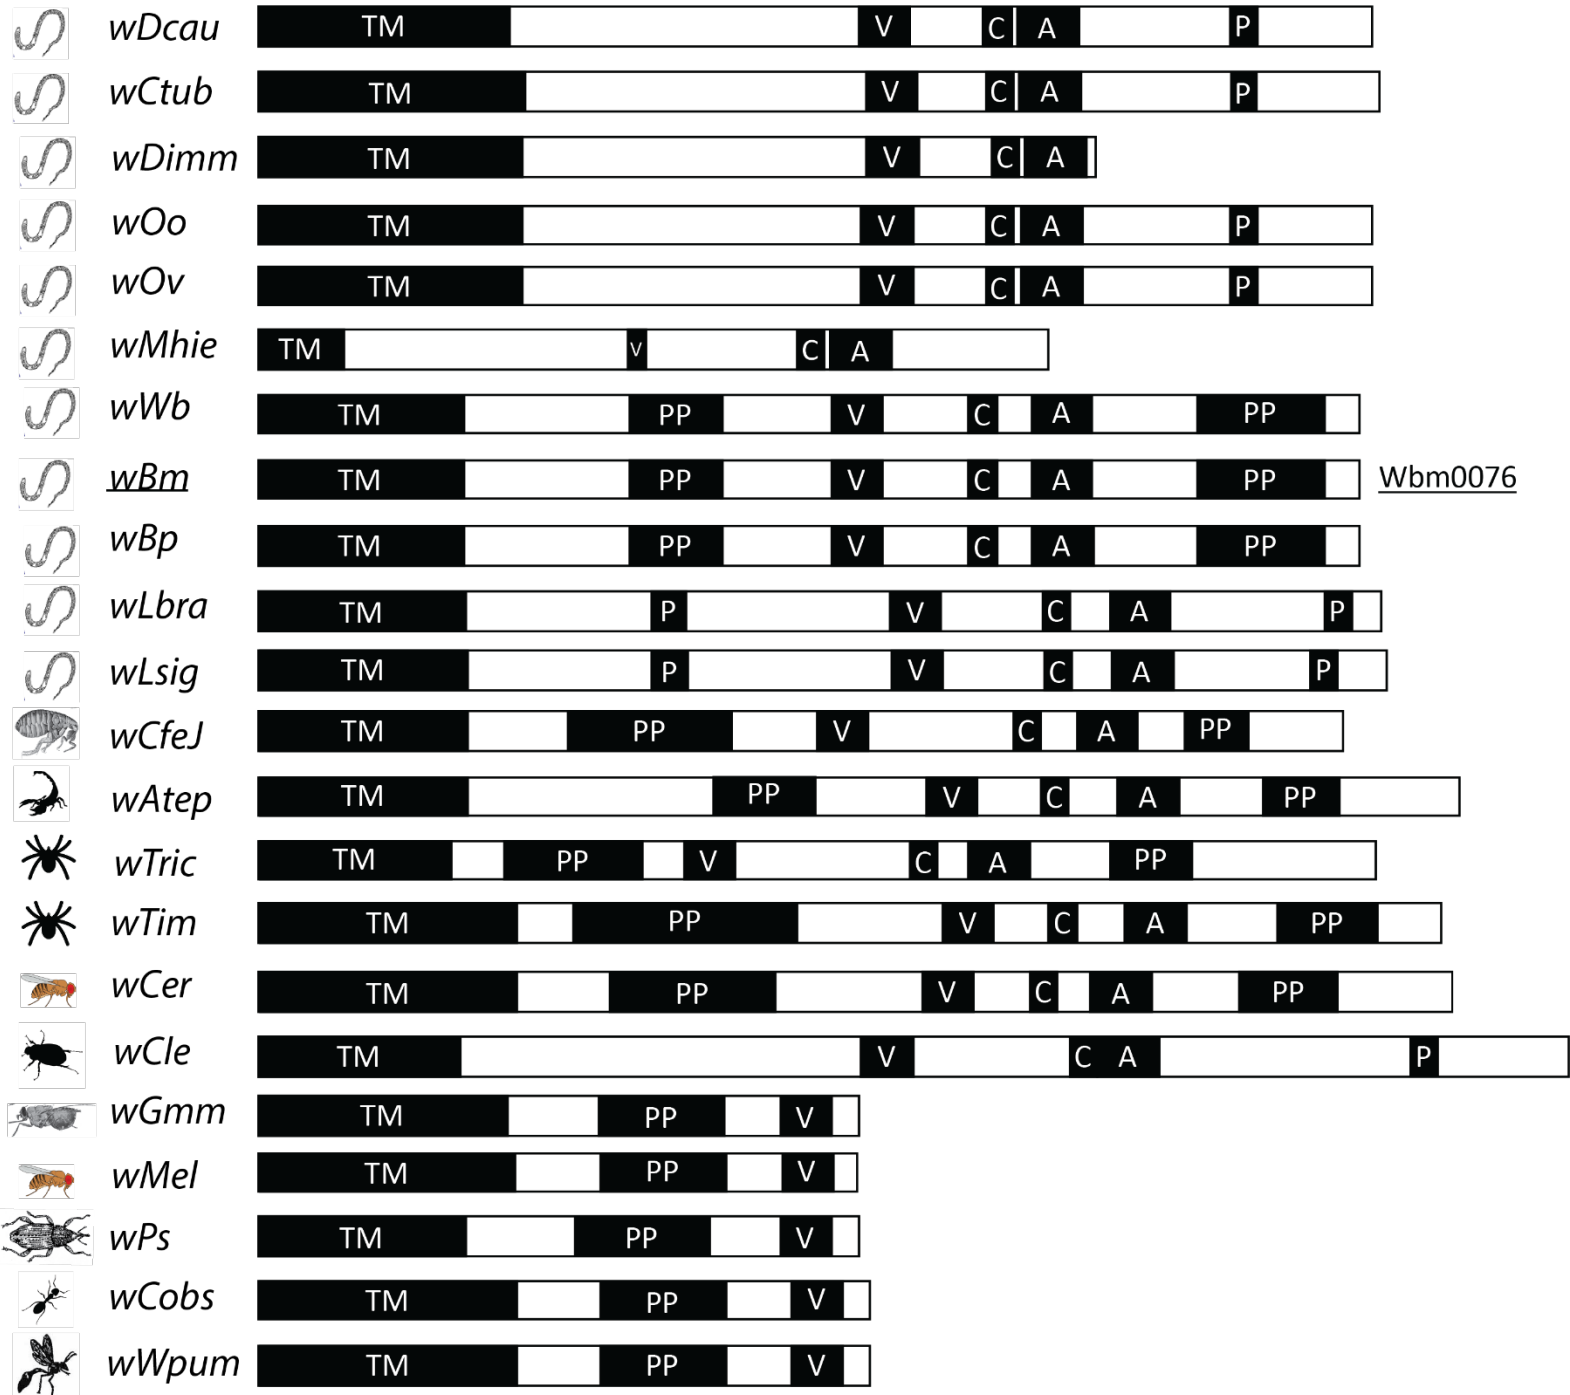

Source: https://www.biorxiv.org/content/10.1101/2022.08.02.502435v1.full.pdf
